# Supplementary material for: Pure redox-sensitive paclitaxel–maleimide prodrug nanoparticles: Endogenous albumin-induced size switching and improved antitumor efficiency
Source: PubMed Central journal article supplement — Acta Pharm Sin B. 2020 Dec 5;11(7):2048–58. doi: 10.1016/j.apsb.2020.12.001 (PMC8343193; doi:10.1016/j.apsb.2020.12.001), 2020-12-05
Supplement: mmc1.pdf [file mmc1.pdf]

## Supporting Information for

### ORIGINAL ARTICLE

# Pure redox-sensitive paclitaxel–maleimide prodrug nanoparticles: Endogenous albumin-induced size switching and improved antitumor efficiency

Xinyu Lou<sup>a,†</sup>, Dong Zhang<sup>b,c,†</sup>, Hao Ling<sup>b</sup>, Zhonggui He<sup>b</sup>, Jin Sun<sup>b</sup>, Mengchi Sun<sup>b,\*</sup>, Dongchun Liu<sup>a,\*</sup>

<sup>a</sup>*School of Traditional Chinese Materia Medica, Shenyang Pharmaceutical University, Shenyang 110016, China*

<sup>b</sup>*Wuya College of Innovation, Shenyang Pharmaceutical University, Shenyang 110016, China*

<sup>c</sup>*Jiangsu Hengrui Medicine Co., Ltd., Lianyungang Eco & Tech Development Zone, Lianyungang 222047, China*

Received 25 August 2020; received in revised form 29 October 2020; accepted 18 November 2020

<sup>†</sup>These authors made equal contributions to this work.

\*Corresponding authors. Tel./fax: +86 24 23984318 (Dongchun Liu); +86 24 23986321 (Mengchi Sun).

E-mail addresses: liudongchun@outlook.com (Dongchun Liu), smc\_1990@aliyun.com (Mengchi Sun).

Running title: Pure redox-sensitive paclitaxel-maleimide prodrug nanoparticles

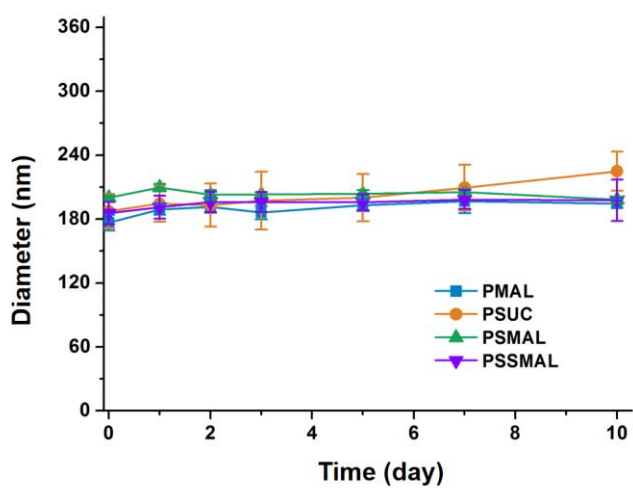

**Figure S1** The long-term stability of nanoparticles within 10 days at 4 °C.

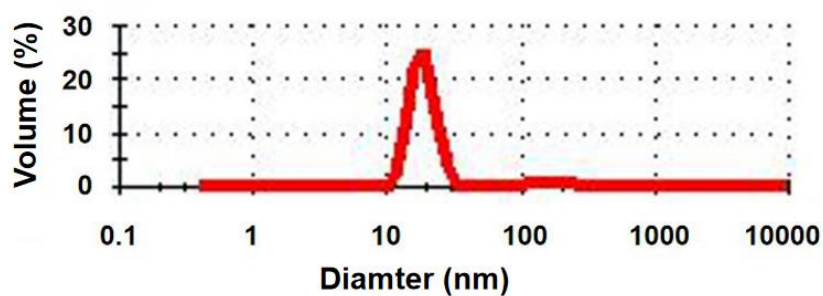

**Figure S2** The particle sizes of PTX-maleimide prodrug NPs exposure to the albumin solution.

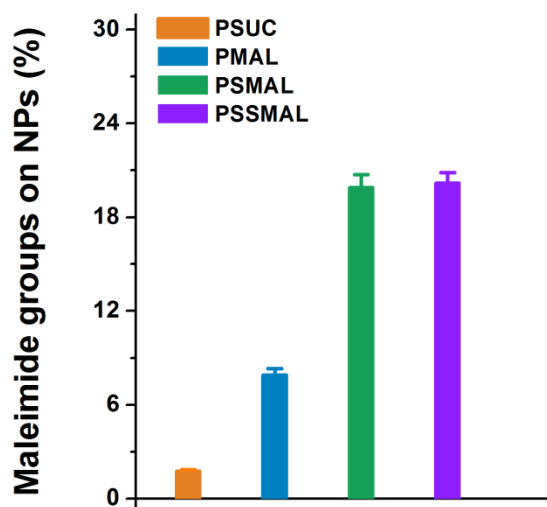

**Figure S3** Maleimide groups on NPs.

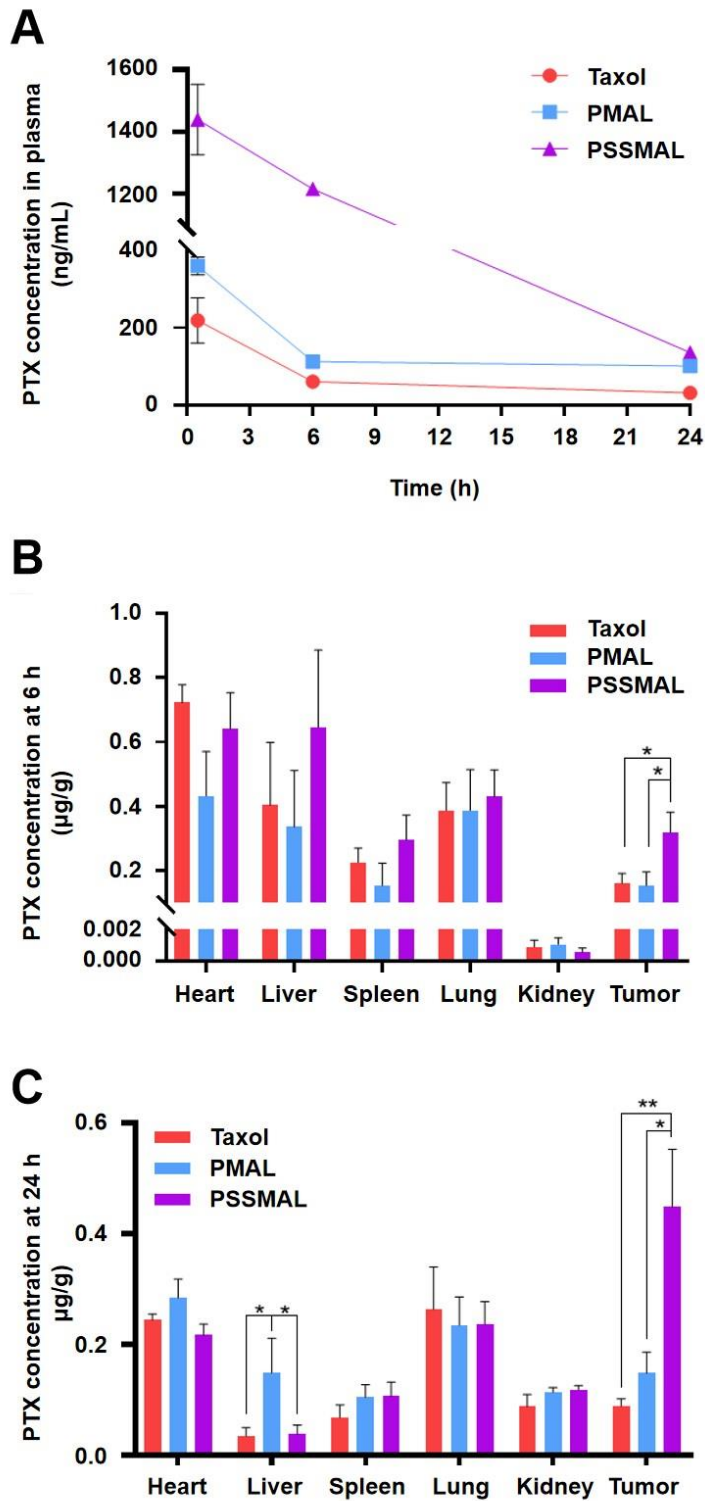

**Figure S4** (A) Pharmacokinetic profiles of NPs after injection (Taxol, PMAL and PSSMAL) at an equivalent PTX dose of 4 mg/kg, multiple organs and tumor biodistribution of PTX at 6 (B) and 24 h (C) in 4T1 xenograft tumor-bearing BALB/c mice;  $n = 3$ ,  $*P < 0.05$ ,  $**P < 0.01$ ,  $***P < 0.001$ .
